# Supplementary material for: Chronopotentiometric Evaluation of Ionization Degree and Dissociation Constant of Imidazolium-Based Ionic Liquid [C6Meim][NTf2] in Polymeric Plasticized Membranes
Source: MDPI journal article supplement (doi:10.3390/membranes12020130), 2022-01-21
Supplement: s1 [file s1]

Supplementary Materials

# Chronopotentiometric Evaluation of Ionization Degree and Dissociation Constant of Imidazolium-Based Ionic Liquid [C<sub>6</sub>Meim][NTf<sub>2</sub>] in Polymeric Plasticized Membranes

Nadezhda V. Pokhvishcheva <sup>1</sup>, Elizaveta K. Gigiadze <sup>1</sup>, Andrey V. Kalinichev <sup>1</sup>, Alexandr V. Ievlev <sup>2</sup>, Konstantin V. Tyutyukin <sup>2</sup> and Maria A. Peshkova <sup>1,\*</sup>

<sup>1</sup> Institute of Chemistry of Saint Petersburg State University, 7/9 Universitetskaya nab, 199034 St. Petersburg, Russia; st040584@student.spbu.ru (N.V.P.); st055887@student.spbu.ru (E.K.G.); a.v.kalinichev@spbu.ru (A.V.K.)

<sup>2</sup> Faculty of Physics of Saint Petersburg State University, 7/9 Universitetskaya nab, 199034 St. Petersburg, Russia; a.ievlev@spbu.ru (A.V.I.); k.tyutyukin@spbu.ru (K.V.T.)

\* Correspondence: m.peshkova@spbu.ru

**Citation:** Pokhvishcheva, N.V.; Gigiadze, E.K.; Kalinichev, A.V.; Ievlev, A.V.; Tyutyukin, K.V.; Peshkova, M.A.

Chronopotentiometric Evaluation of Ionization Degree and Dissociation Constant of Imidazolium-Based Ionic Liquid [C<sub>6</sub>Meim][NTf<sub>2</sub>] in Polymeric Plasticized Membranes.

*Membranes* **2022**, *12*, 130.

<https://doi.org/10.3390/membranes12020130>

membranes12020130

Academic Editors: Beata

Paczosa-Bator and Amir Razmjou

Received: 31 December 2021

Accepted: 18 January 2022

Published: 21 January 2022

**Publisher's Note:** MDPI stays neutral with regard to jurisdictional claims in published maps and institutional affiliations.

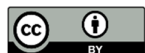

**Copyright:** © 2022 by the authors. Licensee MDPI, Basel, Switzerland. This article is an open access article distributed under the terms and conditions of the Creative Commons Attribution (CC BY) license (<https://creativecommons.org/licenses/by/4.0/>).

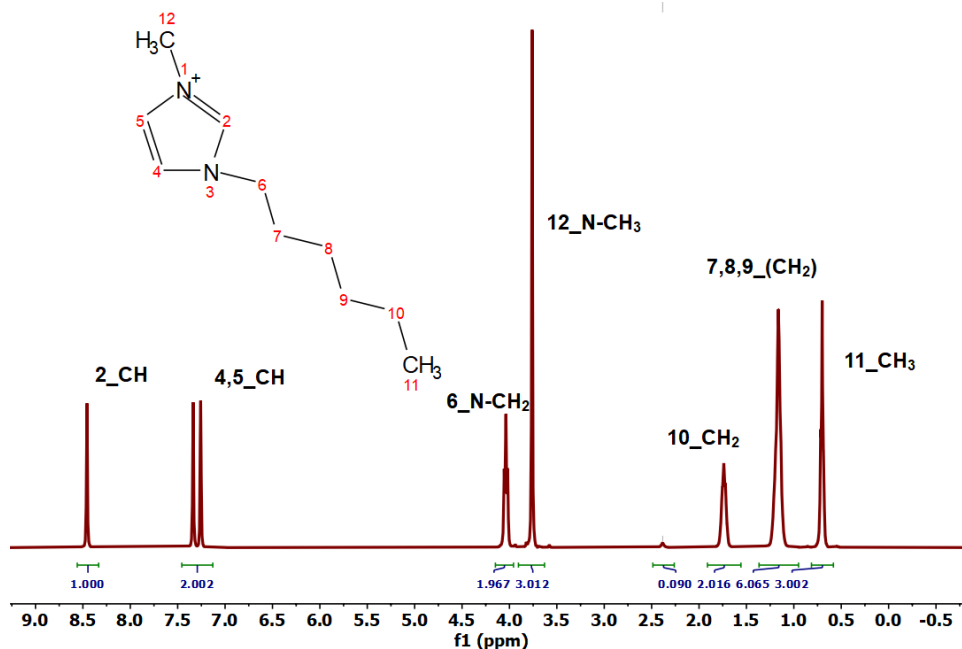

Figure S1.  $^1\text{H}$  NMR spectrum of pure IL  $[\text{C}_6\text{Meim}][\text{NTf}_2]$ .

Table S1. Composition of the prepared PVC- $[\text{C}_6\text{Meim}][\text{NTf}_2]$ -DOS membranes.

| Target IL Content                                   |           |       |       |       |       |       |       |       |       |       |       |       |       |       |       |
|-----------------------------------------------------|-----------|-------|-------|-------|-------|-------|-------|-------|-------|-------|-------|-------|-------|-------|-------|
| ( $\omega_{\text{IL}}$ , % in plasticizing mixture) |           | 0     | 12.4  | 20.8  | 29.2  | 37.3  | 40.9  | 50    | 53.5  | 54.1  | 59.1  | 70.8  | 79.2  | 87.6  | 100   |
| Target IL Content                                   |           |       |       |       |       |       |       |       |       |       |       |       |       |       |       |
| ( $C_{\text{IL}}$ , mol/L of the membrane volume)   |           | 0     | 0.211 | 0.351 | 0.494 | 0.634 | 0.691 | 0.840 | 0.907 | 0.916 | 0.999 | 1.195 | 1.332 | 1.487 | 1.687 |
| Mem-brane Composition                               | IL, (mg)  | 0     | 23.5  | 38    | 54.1  | 71    | 76.1  | 91.1  | 100.4 | 101.4 | 110   | 131   | 144.3 | 165.8 | 184.4 |
|                                                     | DOS, (mg) | 184.4 | 165.8 | 144.3 | 131   | 119.3 | 110   | 91.4  | 87.1  | 86    | 76.1  | 54.1  | 38    | 23.5  | 0     |
|                                                     | PVC, (mg) | 60    |       |       |       |       |       |       |       |       |       |       |       |       |       |
|                                                     |           |       |       |       |       |       |       |       |       |       |       |       |       |       |       |

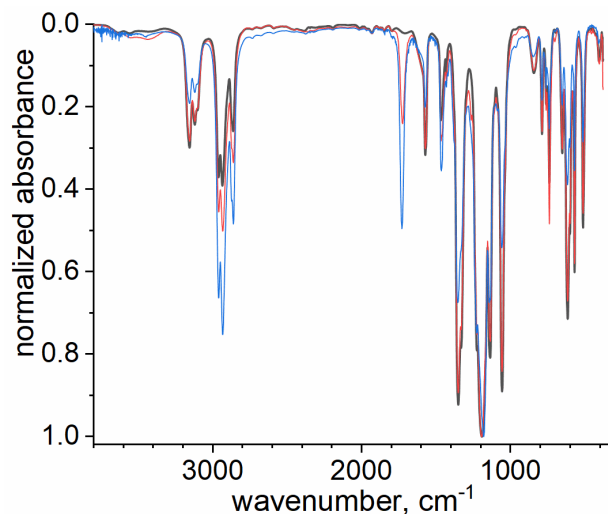

Figure S2. IR absorption spectra of pure  $[\text{C}_6\text{Meim}][\text{NTf}_2]$  (black), membrane exudate (red), and  $[\text{C}_6\text{Meim}][\text{NTf}_2]$ -DOS mixture ( $\omega_{\text{DOS}} = 5\%$ , blue).

**Table S2.** Recalculated IL content in the membranes cast from THF- and CH-based liquid compositions.

| Target IL Content<br>( $\omega_{IL}$ , % in plasticizing mixture) |     | 0 | 12.4    | 20.8 | 29.2 | 37.3 | 40.9    | 49.9 | 53.5 | 54.1 | 59.1 | 70.8 | 79.2 | 87.6 | 100 |
|-------------------------------------------------------------------|-----|---|---------|------|------|------|---------|------|------|------|------|------|------|------|-----|
| Found IL Content<br>( $\omega_{IL}$ , % in plasticizing mixture)  | THF | 0 | 4.8     | 10.1 | 14.4 | 26.9 | 28.9    | 42.2 | 41.9 | 45.4 | 51.6 | 67.4 | 64.2 | 78.5 | -   |
|                                                                   | CH  | 0 | outlier | 10.6 | 3.8  | -    | outlier | 38.6 | -    | -    | 38.3 | 54   | 67.3 | 74.8 | -   |

**Table S3.** The data obtained from fitting chronopotentiometric curves registered with PVC membranes doped with various amount of [C<sub>6</sub>Meim][NTf<sub>2</sub>], with Equation 4.

| Target IL Content<br>( $\omega_{IL}$ , % in plasticizing mixture) | Found IL Content<br>( $\omega_{IL}$ , % in plasticizing mixture) | mean $\chi^2 \times 10^9$ | mean $\tau$ ,<br>(s) | log $C_i$      | log $D_i$        |
|-------------------------------------------------------------------|------------------------------------------------------------------|---------------------------|----------------------|----------------|------------------|
| 0                                                                 | 0                                                                | -                         | -                    | $-4.1 \pm 0.2$ | -                |
| 12.4                                                              | 4.8                                                              | 0.98                      | 1.6                  | $-2.3 \pm 0.3$ | $-8.35 \pm 0.29$ |
| 20.8                                                              | 10.1                                                             | 1.9                       | 3.7                  | $-2.0 \pm 0.1$ | $-8.32 \pm 0.14$ |
| 29.2                                                              | 14.4                                                             | 3.1                       | 3.4                  | $-1.5 \pm 0.2$ | $-7.94 \pm 0.23$ |
| 40.9                                                              | 28.9                                                             | 3.9                       | 3.7                  | $-1.2 \pm 0.2$ | $-6.63 \pm 0.15$ |
| 49.9                                                              | 42.2                                                             | 7.3                       | 4.7                  | $-2.3 \pm 0.3$ | $-6.92 \pm 0.17$ |
| 59.1                                                              | 51.6                                                             | 4.9                       | 2.8                  | $-2.5 \pm 0.3$ | $-7.17 \pm 0.11$ |
| 70.8                                                              | 64.2                                                             | 4.2                       | 4.9                  | $-2.6 \pm 0.2$ | $-7.31 \pm 0.16$ |
| 79.2                                                              | 67.4                                                             | 3.4                       | 6.6                  | $-2.5 \pm 0.2$ | $-7.62 \pm 0.21$ |
| 87.6                                                              | 78.5                                                             | 2.9                       | 4.7                  | $-2.6 \pm 0.1$ | $-8.03 \pm 0.24$ |
| 100                                                               | 100                                                              | 2.2                       | 5.9                  | $-2.8 \pm 0.1$ | $-7.15 \pm 0.15$ |

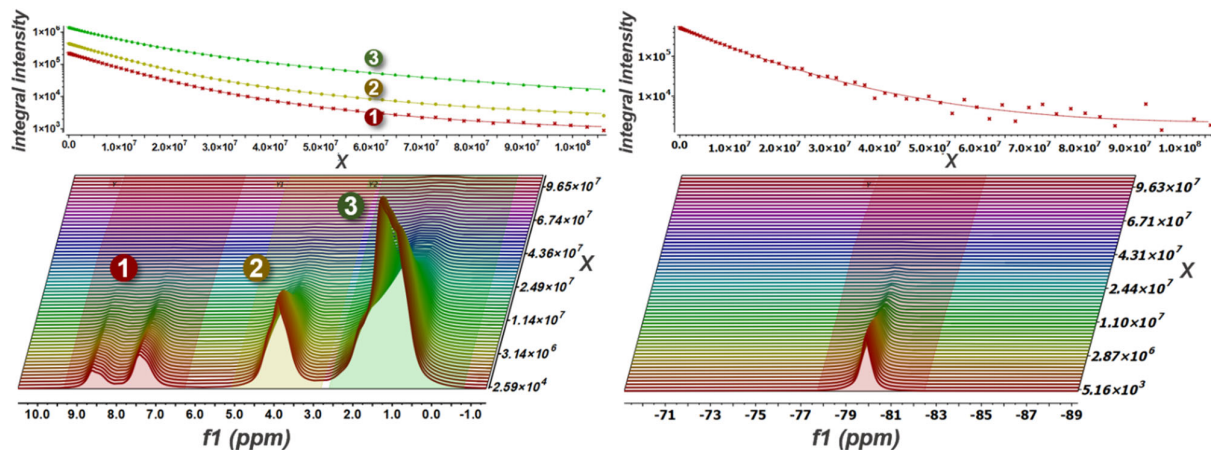**Figure S3.** A stack of  $^1\text{H}$  (left panel) and  $^{19}\text{F}$  (right panel) spectra of the membrane with 45.4 wt.% of IL in the plasticizing mixture at different values of the gradient amplitude. Insets: the respective experimental (symbols) and fitted with Equation 117 (lines) dependences of the integral intensity on the square of gradient amplitude ( $x$ ) for  $^1\text{H}$  and  $^{19}\text{F}$  spectra.

**Table S4.** Diffusion coefficients obtained from fitting integral intensities in  $^1\text{H}$  and  $^{19}\text{F}$  NMR spectra registered with PVC membranes doped with various amount of  $[\text{C}_6\text{Meim}][\text{NTf}_2]$ , versus square of the gradient amplitude ( $x$ );  $D_1$ —“fast” component,  $D_2$ —“slow” component in Equation 17.

| Found IL Content<br>( $\omega_{\text{IL}}$ , % in plasticizing<br>mixture) | obtained from cation peaks<br>in $^1\text{H}$ spectra, $\times 10^7 \text{ cm}^2/\text{s}$ |                   | obtained from anion (fluorine)<br>peaks in $^{19}\text{F}$ spectra, $\times 10^7 \text{ cm}^2/\text{s}$ |                   | mean $D_1$ , log<br>units | mean $D_2$ , log<br>units |
|----------------------------------------------------------------------------|--------------------------------------------------------------------------------------------|-------------------|---------------------------------------------------------------------------------------------------------|-------------------|---------------------------|---------------------------|
|                                                                            | $D_1$                                                                                      | $D_2$             | $D_1$                                                                                                   | $D_2$             |                           |                           |
| 26.9                                                                       | $1.108 \pm 0.011$                                                                          | $0.574 \pm 0.009$ | $1.285 \pm 0.018$                                                                                       | $0.498 \pm 0.081$ | $-6.928 \pm 0.006$        | $-7.272 \pm 0.044$        |
| 41.9                                                                       | $1.731 \pm 0.008$                                                                          | $0.558 \pm 0.009$ | $1.295 \pm 0.012$                                                                                       | $0.531 \pm 0.024$ | $-6.825 \pm 0.004$        | $-7.264 \pm 0.016$        |
| 45.4                                                                       | $1.192 \pm 0.008$                                                                          | $0.446 \pm 0.021$ | $1.303 \pm 0.074$                                                                                       | $0.592 \pm 0.142$ | $-6.905 \pm 0.025$        | $-7.290 \pm 0.087$        |
| pure $[\text{C}_6\text{Meim}][\text{NTf}_2]$                               | $2.055 \pm 0.006$                                                                          | -                 | $2.002 \pm 0.013$                                                                                       | -                 | -                         | -                         |

**Table S5.** The target and found IL concentrations in the studied membranes, and the respective values of  $[\text{C}_6\text{Meim}][\text{NTf}_2]$  ionization degree.

| Target IL Content                                     | Found IL Content                                                    |                                                   | ionization degree,<br>$\alpha_{[\text{C}_6\text{Meim}][\text{NTf}_2]}$ |
|-------------------------------------------------------|---------------------------------------------------------------------|---------------------------------------------------|------------------------------------------------------------------------|
| $\omega_{\text{IL}}$ , % in plasticiz-<br>ing mixture | $\omega_{\text{IL}}^{\text{corr}}$ , % in plasti-<br>cizing mixture | $C_{\text{IL}}$ , mol/l of the<br>membrane volume |                                                                        |
| 12.4                                                  | 4.8                                                                 | 0.080                                             | $0.13 \pm 0.09$                                                        |
| 20.8                                                  | 10.1                                                                | 0.164                                             | $0.13 \pm 0.03$                                                        |
| 29.2                                                  | 14.4                                                                | 0.231                                             | $0.25 \pm 0.12$                                                        |
| 40.9                                                  | 28.9                                                                | 0.466                                             | $0.32 \pm 0.15$                                                        |
| 49.9                                                  | 42.2                                                                | 0.685                                             | $(16 \pm 12) \times 10^{-3}$                                           |
| 59.1                                                  | 51.6                                                                | 0.836                                             | $(6 \pm 5) \times 10^{-3}$                                             |
| 70.8                                                  | 67.4                                                                | 1.107                                             | $(4.0 \pm 1.9) \times 10^{-3}$                                         |
| 79.2                                                  | 64.2                                                                | 0.917                                             | $(6 \pm 3) \times 10^{-3}$                                             |
| 87.6                                                  | 78.5                                                                | 1.133                                             | $(4.0 \pm 1.9) \times 10^{-3}$                                         |
| 100                                                   | 100                                                                 | 1.518                                             | $(1.2 \pm 0.5) \times 10^{-3}$                                         |
